# Supplementary material for: Household Financial Decisions, the Role of Child Gender and Background Risk
Source: Research Square preprint supplement (doi:10.21203/rs.3.rs-7350867/v1), 2025-11-03
Supplement: Supplementary file 1 [file a495487de9350f22106e003e.pdf]

# Appendix A: Tables

Table A.1: Full estimates of the gender-specific effect of land expropriation on household financial decisions, RUMiC sample.

| Dependent variable                       | Stock market participation |                      | Savings rate         |                      |
|------------------------------------------|----------------------------|----------------------|----------------------|----------------------|
|                                          | OLS<br>(1)                 | RE<br>(2)            | OLS<br>(3)           | RE<br>(4)            |
| Any daughter                             | 0.018<br>(0.010)           | 0.017*<br>(0.010)    | -0.009<br>(0.022)    | -0.015<br>(0.021)    |
| Land expropriation                       | -0.050*<br>(0.025)         | -0.044**<br>(0.020)  | 0.080<br>(0.146)     | 0.087<br>(0.137)     |
| Any daughter $\times$ land expropriation | 0.062**<br>(0.020)         | 0.053***<br>(0.019)  | -0.141***<br>(0.040) | -0.147***<br>(0.046) |
| Age                                      | 0.000<br>(0.001)           | 0.000<br>(0.001)     | 0.005*<br>(0.002)    | 0.005**<br>(0.002)   |
| Female                                   | 0.001<br>(0.005)           | 0.002<br>(0.006)     | 0.023<br>(0.027)     | 0.023<br>(0.027)     |
| Married                                  | -0.041<br>(0.045)          | -0.032<br>(0.038)    | -0.042<br>(0.091)    | 0.047<br>(0.094)     |
| Primary education or below               | 0.007<br>(0.018)           | 0.006<br>(0.017)     | -0.028<br>(0.064)    | -0.027<br>(0.064)    |
| Secondary education                      | 0.003<br>(0.015)           | 0.003<br>(0.014)     | 0.045<br>(0.053)     | 0.046<br>(0.055)     |
| Risk attitudes (0-10)                    | 0.002<br>(0.002)           | 0.002<br>(0.002)     | 0.010<br>(0.006)     | 0.007<br>(0.005)     |
| Employed                                 | 0.008<br>(0.008)           | 0.010<br>(0.007)     | 0.004<br>(0.025)     | -0.023<br>(0.027)    |
| Rural hukou                              | -0.026<br>(0.024)          | -0.026<br>(0.021)    | -0.124<br>(0.141)    | -0.129<br>(0.136)    |
| Number of children                       | -0.004<br>(0.007)          | -0.004<br>(0.007)    | -0.034<br>(0.036)    | -0.038<br>(0.037)    |
| Household size                           | -0.011***<br>(0.003)       | -0.011***<br>(0.003) | -0.004<br>(0.023)    | -0.005<br>(0.024)    |
| Single-parent household                  | -0.012<br>(0.024)          | -0.006<br>(0.027)    | -0.161<br>(0.099)    | -0.106<br>(0.110)    |
| Dependency ratio                         | 0.017**<br>(0.006)         | 0.018**<br>(0.007)   | -0.014<br>(0.029)    | -0.007<br>(0.027)    |
| Household labor income (Yuan/10,000)     | 0.024**<br>(0.008)         | 0.022***<br>(0.008)  | 0.102***<br>(0.027)  | 0.076***<br>(0.013)  |
| Household financial wealth (Yuan/10,000) | 0.001**<br>(0.000)         | 0.001**<br>(0.000)   | 0.004<br>(0.004)     | 0.002<br>(0.003)     |
| Household land (Mu)                      | -0.000<br>(0.001)          | -0.000<br>(0.001)    | -0.002<br>(0.004)    | -0.002<br>(0.004)    |
| Mean of dependent variable               | 0.017                      | 0.017                | 0.560                | 0.560                |
| Observations                             | 2,320                      | 2,320                | 2,320                | 2,320                |
| $R^2$                                    | 0.028                      | 0.028                | 0.084                | 0.081                |
| Province fixed effects                   | Yes                        | Yes                  | Yes                  | Yes                  |
| Year fixed effects                       | Yes                        | Yes                  | Yes                  | Yes                  |

Source: RUMiC (2009-2010).

Notes: The sample is composed of rural parents aged 22 to 65 with children under 18. Regression models are estimated using the ordinary least squares and panel random effects specification. Robust standard errors clustered at the province level are given in parentheses. Significance levels: \*  $p < 0.1$ , \*\*  $p < 0.05$ , \*\*\*  $p < 0.01$ .

Table A.2: Full estimates of the gender-specific effect of housing demolition on household financial decisions, CHFS sample.

| Dependent variable                       | Stock market participation |                      | Savings rate         |                      |
|------------------------------------------|----------------------------|----------------------|----------------------|----------------------|
|                                          | OLS<br>(1)                 | RE<br>(2)            | OLS<br>(3)           | RE<br>(4)            |
| Any daughter                             | 0.004<br>(0.015)           | 0.007<br>(0.014)     | -0.011<br>(0.012)    | -0.010<br>(0.012)    |
| Housing demolition                       | -0.043**<br>(0.019)        | -0.030<br>(0.019)    | 0.037<br>(0.024)     | 0.032<br>(0.023)     |
| Any daughter $\times$ housing demolition | 0.094***<br>(0.025)        | 0.069***<br>(0.025)  | -0.029<br>(0.030)    | -0.020<br>(0.032)    |
| Age                                      | 0.004***<br>(0.001)        | 0.003***<br>(0.001)  | -0.004***<br>(0.001) | -0.004***<br>(0.001) |
| Female                                   | 0.032***<br>(0.004)        | 0.030***<br>(0.005)  | -0.004<br>(0.004)    | -0.004<br>(0.004)    |
| Married                                  | 0.038<br>(0.042)           | 0.037<br>(0.034)     | -0.009<br>(0.039)    | -0.013<br>(0.034)    |
| Primary education or below               | -0.136***<br>(0.018)       | -0.128***<br>(0.017) | -0.065***<br>(0.023) | -0.063***<br>(0.023) |
| Secondary education                      | -0.094***<br>(0.016)       | -0.089***<br>(0.014) | 0.015*<br>(0.009)    | 0.010<br>(0.009)     |
| Risk attitudes (1-5)                     | 0.059***<br>(0.008)        | 0.040***<br>(0.006)  | -0.016**<br>(0.006)  | -0.012**<br>(0.006)  |
| Employed                                 | 0.022**<br>(0.010)         | 0.036***<br>(0.009)  | 0.048***<br>(0.012)  | 0.045***<br>(0.012)  |
| Rural <i>hukou</i>                       | -0.071***<br>(0.017)       | -0.070***<br>(0.017) | -0.004<br>(0.012)    | -0.000<br>(0.012)    |
| Number of children                       | -0.027<br>(0.022)          | -0.022<br>(0.018)    | -0.024<br>(0.014)    | -0.030**<br>(0.014)  |
| Household size                           | -0.009<br>(0.007)          | -0.013**<br>(0.006)  | -0.001<br>(0.007)    | 0.002<br>(0.006)     |
| Single-parent household                  | -0.060<br>(0.046)          | -0.056<br>(0.041)    | -0.018<br>(0.038)    | -0.021<br>(0.034)    |
| Dependency ratio                         | 0.012<br>(0.022)           | 0.006<br>(0.016)     | -0.013<br>(0.013)    | -0.009<br>(0.012)    |
| Household income (Yuan/10,000)           | 0.001***<br>(0.000)        | 0.001***<br>(0.000)  | -0.000*<br>(0.000)   | -0.000*<br>(0.000)   |
| Own a house                              | 0.020<br>(0.015)           | 0.020*<br>(0.011)    | -0.014<br>(0.021)    | -0.018<br>(0.021)    |
| Mean of dependent variable               | 0.186                      | 0.186                | 0.474                | 0.474                |
| Observations                             | 10,611                     | 10,611               | 10,611               | 10,611               |
| $R^2$                                    | 0.166                      | 0.162                | 0.030                | 0.029                |
| Province fixed effects                   | Yes                        | Yes                  | Yes                  | Yes                  |
| Year fixed effects                       | Yes                        | Yes                  | Yes                  | Yes                  |

Source: CHFS (2011, 2013, 2017, 2019).

Notes: The sample is composed of urban parents aged 22 to 65 with children under 18. Regression models are estimated using the ordinary least squares and panel random effects specification. Robust standard errors clustered at the province level are given in parentheses.

Significance levels: \*  $p < 0.1$ , \*\*  $p < 0.05$ , \*\*\*  $p < 0.01$ .

Table A.3: Robustness check: child-gender composition, household savings decisions.

| Dependent variable                             | Savings rate        |                      |                     |                      |                     |                     |
|------------------------------------------------|---------------------|----------------------|---------------------|----------------------|---------------------|---------------------|
|                                                | OLS<br>(1)          | RE<br>(2)            | OLS<br>(3)          | RE<br>(4)            | OLS<br>(5)          | RE<br>(6)           |
| <i>Panel A: RUMiC rural sample</i>             |                     |                      |                     |                      |                     |                     |
| First daughter $\times$ land expropriation     | -0.140**<br>(0.048) | -0.148***<br>(0.053) |                     |                      |                     |                     |
| Share of daughters $\times$ land expropriation |                     |                      | -0.130**<br>(0.044) | -0.132***<br>(0.048) |                     |                     |
| Daughter only $\times$ land expropriation      |                     |                      |                     |                      | -0.096**<br>(0.041) | -0.095**<br>(0.045) |
| Observations                                   | 2,320               | 2,320                | 2,320               | 2,320                | 2,320               | 2,320               |
| $R^2$                                          | 0.084               | 0.081                | 0.085               | 0.081                | 0.085               | 0.082               |
| <i>Panel B: CHFS urban sample</i>              |                     |                      |                     |                      |                     |                     |
| First daughter $\times$ housing demolition     | -0.036<br>(0.033)   | -0.026<br>(0.032)    |                     |                      |                     |                     |
| Share of daughters $\times$ housing demolition |                     |                      | -0.051<br>(0.034)   | -0.043<br>(0.035)    |                     |                     |
| Daughter only $\times$ housing demolition      |                     |                      |                     |                      | -0.061*<br>(0.033)  | -0.054*<br>(0.032)  |
| Observations                                   | 10,611              | 10,611               | 10,611              | 10,611               | 10,611              | 10,611              |
| $R^2$                                          | 0.030               | 0.029                | 0.030               | 0.030                | 0.030               | 0.030               |
| Individual and household controls              | Yes                 | Yes                  | Yes                 | Yes                  | Yes                 | Yes                 |
| Province fixed effects                         | Yes                 | Yes                  | Yes                 | Yes                  | Yes                 | Yes                 |
| Year fixed effects                             | Yes                 | Yes                  | Yes                 | Yes                  | Yes                 | Yes                 |

Source: RUMiC (2009-2010) & CHFS (2011, 2013, 2017, 2019).

Notes: The sample is composed of parents aged 22 to 65 with children under 18. Regression models are estimated using the ordinary least squares and panel random effects specification where the share of savings in household financial portfolio is used as the dependent variable. The control variables are listed in Tables 2 and 3. Robust standard errors clustered at the province level are given in parentheses.

Significance levels: \*  $p < 0.1$ , \*\*  $p < 0.05$ , \*\*\*  $p < 0.01$ .

Table A.4: Other robustness checks for gender-specific effect of land expropriation on household financial decisions, RUMiC sample.

| Dependent variable                                     | Stock market participation |                     | Savings rate         |                      |
|--------------------------------------------------------|----------------------------|---------------------|----------------------|----------------------|
|                                                        | OLS<br>(1)                 | RE<br>(2)           | OLS<br>(3)           | RE<br>(4)            |
| <i>Panel A: Controlling for financial compensation</i> |                            |                     |                      |                      |
| Any daughter $\times$ land expropriation               | 0.071***<br>(0.018)        | 0.066***<br>(0.016) | -0.111**<br>(0.038)  | -0.125**<br>(0.057)  |
| Observations                                           | 2,320                      | 2,320               | 2,320                | 2,320                |
| $R^2$                                                  | 0.030                      | 0.03                | 0.095                | 0.092                |
| <i>Panel B: Excluding Nanjing sample</i>               |                            |                     |                      |                      |
| Any daughter $\times$ land expropriation               | 0.062**<br>(0.020)         | 0.053***<br>(0.019) | -0.143***<br>(0.039) | -0.150***<br>(0.045) |
| Observations                                           | 2,276                      | 2,276               | 2,276                | 2,276                |
| $R^2$                                                  | 0.029                      | 0.029               | 0.085                | 0.081                |
| <i>Panel C: Excluding zero savings rate</i>            |                            |                     |                      |                      |
| Any daughter $\times$ land expropriation               | 0.063**<br>(0.022)         | 0.057***<br>(0.021) | -0.118***<br>(0.034) | -0.112***<br>(0.034) |
| Observations                                           | 1,733                      | 1,733               | 1,733                | 1,733                |
| $R^2$                                                  | 0.030                      | 0.030               | 0.083                | 0.082                |
| Individual and household controls                      | Yes                        | Yes                 | Yes                  | Yes                  |
| Province fixed effects                                 | Yes                        | Yes                 | Yes                  | Yes                  |
| Year fixed effects                                     | Yes                        | Yes                 | Yes                  | Yes                  |

Source: RUMiC (2009-2010).

Notes: The sample is composed of rural parents aged 22 to 65 with children under 18. In Panel A, we further control for the effect of financial compensation by replacing the actual value of household financial wealth with a predicted wealth value for the expropriated group. Panel B excludes households from the city of Nanjing. Panel C excludes households with zero savings rates. Regression models are estimated using the ordinary least squares and panel random effects specification. The control variables are listed in Table 2. Robust standard errors clustered at the province level are given in parentheses.

Significance levels: \*  $p < 0.1$ , \*\*  $p < 0.05$ , \*\*\*  $p < 0.01$ .

Table A.5: Other robustness checks for gender-specific effect of housing demolition on household financial decisions, CHFS sample.

| Dependent variable                                  | Stock market participation |                     | Savings rate      |                   |
|-----------------------------------------------------|----------------------------|---------------------|-------------------|-------------------|
|                                                     | OLS<br>(1)                 | RE<br>(2)           | OLS<br>(3)        | RE<br>(4)         |
| <i>Panel A: Receiving housing compensation</i>      |                            |                     |                   |                   |
| Any daughter $\times$ housing compensation          | 0.058**<br>(0.024)         | 0.037*<br>(0.021)   | 0.006<br>(0.027)  | 0.013<br>(0.026)  |
| Observations                                        | 10,611                     | 10,611              | 10,611            | 10,611            |
| $R^2$                                               | 0.165                      | 0.161               | 0.029             | 0.029             |
| <i>Panel B: Excluding multi-property households</i> |                            |                     |                   |                   |
| Any daughter $\times$ housing demolition            | 0.080**<br>(0.033)         | 0.073**<br>(0.032)  | -0.007<br>(0.042) | -0.008<br>(0.042) |
| Observations                                        | 6,086                      | 6,086               | 6,086             | 6,086             |
| $R^2$                                               | 0.134                      | 0.131               | 0.033             | 0.033             |
| <i>Panel C: Excluding zero savings rate</i>         |                            |                     |                   |                   |
| Any daughter $\times$ housing demolition            | 0.118***<br>(0.027)        | 0.092***<br>(0.027) | -0.026<br>(0.023) | -0.017<br>(0.026) |
| Observations                                        | 8,232                      | 8,232               | 8,232             | 8,232             |
| $R^2$                                               | 0.167                      | 0.164               | 0.060             | 0.059             |
| Individual and household controls                   | Yes                        | Yes                 | Yes               | Yes               |
| Province fixed effects                              | Yes                        | Yes                 | Yes               | Yes               |
| Year fixed effects                                  | Yes                        | Yes                 | Yes               | Yes               |

Source: CHFS (2011, 2013, 2017, 2019).

Notes: The sample is composed of urban parents aged 22 to 65 with children under 18. In Panel A, we use a dummy for receiving compensation from housing demolition as the dependent variable. Panel B excludes households owning more than one property. Panel C excludes households with zero savings rates. Regression models are estimated using the ordinary least squares and panel random effects specification. The control variables are listed in Table 3. Robust standard errors clustered at the province level are given in parentheses.

Significance levels: \*  $p < 0.1$ , \*\*  $p < 0.05$ , \*\*\*  $p < 0.01$ .

Table A.6: Estimates of the effect of land expropriation on household savings rates, by safety net access.

| Sample                            | Pension or Insurance |                      | Pension Only        |                     | Insurance Only      |                      |
|-----------------------------------|----------------------|----------------------|---------------------|---------------------|---------------------|----------------------|
|                                   | Yes<br>(1)           | No<br>(2)            | Yes<br>(3)          | No<br>(4)           | Yes<br>(5)          | No<br>(6)            |
| Any daughter                      | −0.136*<br>(0.070)   | 0.005<br>(0.019)     | −0.184**<br>(0.055) | 0.010<br>(0.021)    | −0.125<br>(0.083)   | −0.001<br>(0.019)    |
| Land expropriation                | 0.286***<br>(0.050)  | 0.061<br>(0.149)     | 0.066*<br>(0.035)   | 0.093<br>(0.154)    | 0.349***<br>(0.089) | 0.054<br>(0.138)     |
| Any daughter × land expropriation | 0.005<br>(0.081)     | −0.182***<br>(0.037) | 0.014<br>(0.090)    | −0.154**<br>(0.052) | −0.046<br>(0.092)   | −0.163***<br>(0.034) |
| Individual and household controls | Yes                  | Yes                  | Yes                 | Yes                 | Yes                 | Yes                  |
| Province fixed effects            | Yes                  | Yes                  | Yes                 | Yes                 | Yes                 | Yes                  |
| Year fixed effects                | Yes                  | Yes                  | Yes                 | Yes                 | Yes                 | Yes                  |
| Mean of dependent variable        | .63                  | .548                 | .652                | .548                | .62                 | .553                 |
| Observations                      | 333                  | 1,987                | 257                 | 2,063               | 228                 | 2,092                |
| $R^2$                             | .19                  | .087                 | .241                | .087                | .212                | .083                 |

Source: RUMiC (2009-2010).

Notes: The sample is composed of rural parents aged 22 to 65 with children under 18. Regression models are estimated using the ordinary least squares. The control variables are listed in Table 2. Robust standard errors clustered at the province level are given in parentheses.

Significance levels: \*  $p < 0.1$ , \*\*  $p < 0.05$ , \*\*\*  $p < 0.01$ .

Table A.7: The effect of land expropriation on household financial decisions by city-rural house price differential, RUMiC sample

| Sample by house price differential         | Full Sample<br>(1)   | Lowest<br>(2)      | Mid<br>(3)         | Highest<br>(4)       |
|--------------------------------------------|----------------------|--------------------|--------------------|----------------------|
| <i>Panel A: Stock market participation</i> |                      |                    |                    |                      |
| Any son                                    | −0.020*<br>(0.009)   | −0.025<br>(0.025)  | −0.018<br>(0.009)  | −0.019<br>(0.009)    |
| Land expropriation                         | 0.040***<br>(0.009)  | −0.009<br>(0.029)  | 0.056<br>(0.038)   | −0.050**<br>(0.014)  |
| Any son × land expropriation               | −0.090***<br>(0.019) | 0.019**<br>(0.005) | −0.134*<br>(0.050) | 0.025<br>(0.012)     |
| Mean of dependent variable                 | .017                 | .019               | .018               | .015                 |
| Observations                               | 2,320                | 626                | 886                | 808                  |
| $R^2$                                      | .033                 | .038               | .067               | .032                 |
| Individual and household controls          | Yes                  | Yes                | Yes                | Yes                  |
| Province fixed effects                     | Yes                  | Yes                | Yes                | Yes                  |
| Year fixed effects                         | Yes                  | Yes                | Yes                | Yes                  |
| <i>Panel B: Savings rate</i>               |                      |                    |                    |                      |
| Any son                                    | 0.037<br>(0.036)     | 0.032<br>(0.065)   | −0.011<br>(0.048)  | 0.106**<br>(0.021)   |
| Land expropriation                         | −0.053<br>(0.110)    | 0.192<br>(0.152)   | −0.106<br>(0.153)  | −0.112***<br>(0.018) |
| Any son × land expropriation               | 0.096**<br>(0.041)   | 0.118<br>(0.063)   | 0.113<br>(0.101)   | 0.134**<br>(0.037)   |
| Mean of dependent variable                 | .56                  | .57                | .566               | .545                 |
| Observations                               | 2,320                | 626                | 886                | 808                  |
| $R^2$                                      | .085                 | .135               | .124               | .115                 |
| Individual and household controls          | Yes                  | Yes                | Yes                | Yes                  |
| Province fixed effects                     | Yes                  | Yes                | Yes                | Yes                  |
| Year fixed effects                         | Yes                  | Yes                | Yes                | Yes                  |

Source: RUMiC (2009-2010).

Notes: The sample is composed of rural parents aged 22 to 65 with children under 18. Regression models are estimated using the ordinary least squares. The control variables are listed in Table 2. Robust standard errors clustered at the province level are given in parentheses.

Significance levels: \*  $p < 0.1$ , \*\*  $p < 0.05$ , \*\*\*  $p < 0.01$ .

Table A.8: The effect of land expropriation on household financial decisions by city-rural house price differential, CHFS sample

| Sample by house price differential         | Full Sample<br>(1)   | Lowest<br>(2)        | Mid<br>(3)         | Highest<br>(4)     |
|--------------------------------------------|----------------------|----------------------|--------------------|--------------------|
| <i>Panel A: Stock market participation</i> |                      |                      |                    |                    |
| Any son                                    | −0.004<br>(0.017)    | 0.009<br>(0.028)     | 0.027<br>(0.024)   | −0.038<br>(0.027)  |
| Housing demolition                         | 0.058**<br>(0.022)   | 0.111**<br>(0.049)   | 0.058**<br>(0.027) | 0.015<br>(0.030)   |
| Any son × housing demolition               | −0.085***<br>(0.026) | −0.153***<br>(0.048) | −0.058<br>(0.048)  | −0.045*<br>(0.023) |
| Mean of dependent variable                 | .186                 | .139                 | .478               | .477               |
| Observations                               | 10,611               | 3,048                | 3,203              | 4,360              |
| $R^2$                                      | .165                 | .                    | .116               | .                  |
| Individual and household controls          | Yes                  | Yes                  | Yes                | Yes                |
| Province fixed effects                     | Yes                  | Yes                  | Yes                | Yes                |
| Year fixed effects                         | Yes                  | Yes                  | Yes                | Yes                |
| <i>Panel B: Savings rate</i>               |                      |                      |                    |                    |
| Any son                                    | −0.001<br>(0.015)    | −0.007<br>(0.033)    | −0.009<br>(0.030)  | 0.007<br>(0.013)   |
| Housing demolition                         | −0.014<br>(0.024)    | −0.001<br>(0.052)    | 0.017<br>(0.051)   | −0.048<br>(0.040)  |
| Any son × housing demolition               | 0.061*<br>(0.033)    | 0.048<br>(0.076)     | 0.082<br>(0.059)   | 0.063<br>(0.046)   |
| Mean of dependent variable                 | .474                 | .466                 | .478               | .477               |
| Observations                               | 10,611               | 3,048                | 3,203              | 4,360              |
| $R^2$                                      | .03                  | .05                  | .045               | .038               |
| Individual and household controls          | Yes                  | Yes                  | Yes                | Yes                |
| Province fixed effects                     | Yes                  | Yes                  | Yes                | Yes                |
| Year fixed effects                         | Yes                  | Yes                  | Yes                | Yes                |

Source: CHFS (2011, 2013, 2017, 2019).

Notes: The sample is composed of urban parents aged 22 to 65 with children under 18. Regression models are estimated using the ordinary least squares. The control variables are listed in Table 3. Robust standard errors clustered at the province level are given in parentheses.

Significance levels: \*  $p < 0.1$ , \*\*  $p < 0.05$ , \*\*\*  $p < 0.01$ .
